# Supplementary material for: Antibody-catalyzed activation of a model tripartate prodrug by a tandem hydrolysis–1,6-elimination reaction
Source: Royal Society of Chemistry journal article supplement (doi:10.1039/b103971g), 2001-01-01
Supplement: b103971g.doc [file b103971g.doc]

**Supplementary Information**

Antibody-catalyzed activation of a model tripartate prodrug by a tandem hydrolysis-1,6-elimination reaction.†

A. Nicole Dinaut,and Scott D. Taylor*

Department of Chemistry, University of Waterloo, 200 University Avenue West, Waterloo, Ontario, Canada, N2L 3G1

A. Syntheses

A.1 Synthesis of Model Tripartate Prodrug Substrate 3

**Allyl 4-(methylamino)benzoate (I).** To a suspension of *p*-(methylamino)benzoic acid (1.00 g, 6.62 mmol, 1 eq.) in water (20 mL) was added a 40% aqueous solution of tetrabutyl ammonium hydroxide (4.29 mL, 6.62 mmol, 1 eq.), and the mixture was stirred at room temperature until all of the acid dissolved. The pale brown, clear solution was stirred at room temperature for 30 min.Water was removed on a high-vacuum rotary evaporator, and the residue was placed under high vacuum for an additional 12 h, yielding the crude salt as an off-white solid. The salt was then dissolved in dry DMF (20 mL), and to this was added allyl chloride (0.65 mL, 7.94 mmol, 1.2 eq.), dropwise, with stirring, and the reaction was stirred at room temperature for 12 h. To the solution was then added additional dichloromethane (100 mL), water (100 mL), and the biphasic solution was transferred to a separatory funnel. The organic layer was washed with water (2100 mL), then with a solution of NaCl (sat’d. aqueous, 50 mL), dried (MgSO4) and concentrated under reduced pressure. The residue was purified by silica gel chromatography (dichloromethane:hexanes = 85:15, Rf = 0.3) to yield pure **I** as a clear, colorless oil (0.96 g, 76%). 1H NMR (300 MHz, CDCl3):  2.86 (s, 3H), 4.18 (s, 1H), 4.75 (d, *J* = 4.8 Hz, 2H), 5.23 (d, *J* = 10.7 Hz, 1H), 5.36 (d, *J* = 17.7 Hz, 1H), 6.00 (m, 1H), 6.53 (d, *J* = 8.2 Hz, 2H), 7.88 (d, *J* = 8.4 Hz, 2H); 13C NMR (75 MHz, CDCl3):  29.8, 64.6, 110.8, 117.3, 117.5, 131.3, 132.6, 153.0, 166.4; MS (EI): *m/z* 191 (M+, 48%), 143 (100%); HRMS(EI) calcd for C11H13NO2 191.0946, found 191.0947.

**Allyl 4-{methyl[(4-nitrophenoxy)carbonyl]amino}benzoate (II).** To a cooled (ice bath) and stirred solution of **I** (0.5352 g, 2.80 mmol, 1.0 eq.) and *N*-methylmorpholine (0.31 mL, 2.80 mmol, 1.0 eq.) in dry dichloromethane (10 mL) was added *p*-nitrophenylchloroformate (0.5642 g, 2.80 mmol, 1.0 eq.), and the reaction was allowed to come to room temperature gradually. A white precipitate formed gradually after addition of the chloroformate (*N*-methylmorpholine hydrochloride salt), and the reaction was stirred at room temperature for 48 h. Dichloromethane (30 mL) was added to the flask, and this solution was washed with 0.1 M HCl (330 mL), water (330 mL), brine (230 mL), dried (MgSO4), filtered, and the solvent was removed *via* rotary evaporation. The residue was purified by silica gel chromatography (hexanes:ethyl acetate = 80:20, Rf = 0.25) to yield pure **II** as a light yellow solid (0.64 g, 64%). mp = 86 – 88 C. 1H NMR (300 MHz, CDCl3):  3.47 (s, 3H), 4.82 (d, *J* = 5.5 Hz, 2H), 5.30 (m, 2H), 6.01 (m, 1H), 7.29 (d, *J* = 8.8 Hz, 2H), 7.42 (d, *J* = 8.6 Hz, 2H), 8.10 (d, *J* = 8.2 Hz, 2H), 8.23 (d, *J* = 9.4 Hz, 2H); 13C NMR (75 MHz, CDCl3):  37.8, 65.5, 118.2, 122.0, 124.9, 128.1, 130.4, 131.9, 144.8, 146.2, 151.9, 155.6, 165.2; MS (EI): *m/z* 356 (M+, 15%), 218 (M+ - OArNO2, 100%); HRMS(EI) calcd for C18H16N2O6 356.1008, found 356.1020.

**4-{Methyl[(4-nitrophenoxy)carbonyl]amino}benzoic acid** **(III).** To a solution of **II** (0.42 g, 1.18 mmol, 1.0 eq.) in dichloromethane/THF (1:2 = dichloromethane:THF; 6 mL) was added dimedone (0.413 g, 2.95 mmol, 2.5 eq.) and the catalyst, tetrakis triphenylphosphine Pd(0) (0.136 g, 0.118 mmol, 10 mol%). The reaction flask was covered with tin foil, and the clear solution was stirred at room temperature for 20 min. During this time, a white precipitate formed, which was filtered, and washed with dichloromethane (10 mL) to yield pure **III** as a white solid (0.370 g, 99%). mp = 250 – 252 C. 1H NMR (300 MHz, CDCl3):  3.41 (s, 3H), 7.49 (d, *J* = 7.8 Hz, 2H), 7.62 (d, *J* = 7.8 Hz, 2H), 7.98 (d, *J* = 7.8 Hz, 2H), 8.27 (d, *J* = 8.3 Hz, 2H); 13C NMR (75 MHz, CDCl3):  37.6, 122.9, 125.0, 125.4, 128.4, 130.0, 144.6, 146.1, 151.8, 155.8, 166.6; MS (EI): *m/z* 316 (M+, 16%), 178 (M+ - OArNO2, 100%); HRMS(EI) calcd for C15H12N2O6 316.0695, found 316.0708.

**4-Nitrophenyl 4-(hydroxymethyl)phenyl(methyl)carbamate (IV).** To a cooled (ice bath) and stirred solution of benzyltriethylammonium borohydride (1.97 g, 9.52 mmol, 2.0 eq.) in dry dichloromethane (20 mL) was added over a period of 5 min trimethylsilylchloride (1.20 mL, 9.46 mmol, 2.0 eq.). This solution was stirred for 20 min at 0 - 4C. To this was added the acid **III** (1.50 g, 4.75 mmol, 1.0 eq.), which did not dissolve until the ice bath was removed and the reaction had warmed to room temperature (approximately 15 min). The pale yellow solution was stirred at room temperature for a period of 2 h, at which point none of the acid remained (TLC). A solution of NaHCO3 (5% aqueous, 20 mL) was added slowly, and dichloromethane (50 mL) was added to the flask. The organic layer was washed with 0.1 M HCl (25 mL), brine (25 mL), then dried (MgSO4) and concentrated under reduced pressure to yield a yellow oil. Purification *via* silica gel chromatography (hexanes:ethyl acetate = 50:50, Rf = 0.3) yielded pure **IV** as a pale yellow oil (1.00 g, 70%). 1H NMR (200 MHz, CDCl3):  1.73 (bt, unresolved, 1H), 3.43 (s, 3H), 4.73 (d, *J* = 3.7 Hz, 2H), 7.20 – 7.50 (m, 6H), 8.23 (d, *J* = 8.7 Hz, 2H); 13C NMR (50 MHz, CDCl3):  38.4, 64.4, 122.0, 124.9, 125.9, 127.7, 140.2, 141.7, 145.1, 152.6, 156.3; MS (EI): *m/z* 302 (M+, 27%), 164 (M+ - OArNO2, 100%); HRMS(EI) calcd for C15H14N2O5 302.0903, found 302.0910.

**4-[({4-Nitrophenyl}carbonyl)(methyl)amino]benzyl (4-nitrophenyl) carbonate (V).** To a cooled and stirred solution of the alcohol **IV** (0.900 g, 2.99 mmol, 1.0 eq.) and *p*-nitrophenyl chloroformate (0.720 g, 3.59 mmol, 1.2 eq.) in dry THF (10 mL) was added dry pyridine (0.290 mL, 3.59 mmol, 1.2 eq.). A white precipitate formed immediately, and within 5 min the reaction was complete and the product precipitated out of solution. The product was redissolved in dichloromethane (50 mL), and the solution was washed with 0.1 M HCl (225 mL), water (25 mL), brine (25 mL), then dried (MgSO4). Solvent was evaporated under reduced pressure, and the white solid was recrystallized in hexanes/ethyl acetate to yield pure **V** (1.01 g, 72%). mp = 153-155C; 1H NMR (200 MHz, CDCl3):  3.46 (s, 3H), 5.31 (s, 2H), 7.20 – 7.55 (m, 8H), 8.20 – 8.30 (m, 4H); 13C NMR (75 MHz, CDCl3):  38.26, 70.12, 121.68, 122.13, 125.03, 125.26, 126.19, 129.53, 133.00, 142.91, 144.91, 145.38, 152.35, 155.37, 155.90; MS (EI): *m/z* 468 (M+ + H+, 11%), 329 (M+ - OArNO2, 92%), 123 (100%); HRMS(EI) calcd for C22H17N3O9 467.096479, found 467.097693.

***Tert*-butyl *N*-{(4-{methyl[(4-nitrophenoxy)carbonyl]amino}benzyloxy)carbonyl}-tryptophate (VI).** To a stirring suspension of *L*-tryptophan *tert*-butyl ester hydrochloride salt (0.254 g, 0.86 mmol, 1.0 eq.) in dry dichloromethane (10 mL) was added dimethylaminopyridine (DMAP) (0.209 g, 1.71 mmol, 2.0 eq.), and within minutes the reaction mixture became clear and colorless. To this solution was added compound **V** (0.4 g, 0.86 mmol, 1.0 eq.), at which point the reaction became bright yellow. After stirring at room temperature for 12 h, the reaction was diluted with dichloromethane (50 mL) and washed with a solution of NaHCO3 (5% aqueous, 250 mL), 0.1 M HCl (250 mL), and brine (250 mL). The organic layer was dried (MgSO4), and concentrated under reduced pressure to yield a yellow oil. Following purification *via* silica gel chromatography (hexanes:ethyl acetate = 60:40; Rf = 0.3), the desired compound **VI** was obtained as a brittle, foamy, light yellow solid (0.451 g, 89%). mp = 76 – 78 C. 1H NMR (300 MHz, CDCl3):  1.38 (s, 9H), 3.27 (m, 2H), 3.43 (bs, 3H), 4.60 (bs, 1H), 5.00-5.20 (m, 2H), 5.30 (bs, 1H), 7.00 (bs, 1H), 7.08-7.40 (m, 8H), 7.57 (d, *J* = 7.2 Hz, 2H), 8.08 (bs, 1H), 8.23 (bd, 2H); 13C NMR (75 MHz, CDCl3):  28.0, 38.5, 55.2, 66.1, 82.2, 110.0, 111.3, 118.8, 119.5, 122.0, 122.3, 123.0, 125.1, 126.1, 127.8, 129.1, 135.6, 136.2, 142.1, 144.9, 152.7, 155.8, 156.1, 171.2; MS (EI): *m/z* 588 (M+, 17%), 130 (100%); HRMS(EI) calcd for C31H32N4O8 588.2220, found 588.2232.

***N*-{(4-{methyl[(4-nitrophenoxy)carbonyl]amino}benzyloxy)carbonyl}tryptophan (3).** The *tert*-butyl ester **VI** (0.150 g, 0.25 mmol, 1.0 eq.) was dissolved in dry dichloromethane (3 mL), and to this solution was added anisole (0.055 mL, 0.51 mmol, 2 eq.) and thioanisole (0.060 mL, 0.51 mmol, 2.0 eq.). An aliquot of TFA (1 mL) was added, dropwise with stirring, and the reaction was left to stir at room temperature for 12 h. The solution was then transferred to a 250 mL round-bottom flask, to which was added chloroform (50 mL), and the solvent was removed by rotary evaporation. This procedure was repeated several times in order to remove the TFA from the solution. After placing the sample under vacuum for 3 h, the reaction mixture was purified *via* silica gel chromatography (chloroform:methanol = 90:10, Rf = 0.3) to yield **3** as a pale yellow crystalline solid (0.080 g, 59%). 1H NMR (400 MHz, CDCl3):  3.15-3.45 (m, 5H), 4.66 (bs, 1H), 4.85-5.14 (m, 2H), 5.41 (bs, 1H), 6.81 (bs, 1H), 6.88-7.24 (m, 9H), 7.48 (bd, 2H), 8.16 (bd, 2H); 13C NMR (125 MHz, CDCl3):  27.7, 38.6, 55.0, 67.0, 109.6, 111.6, 118.7, 119.8, 122.4, 123.4, 125.3, 126.4, 127.8, 129.2, 136.3, 142.3, 145.2, 152.8, 153.9, 156.2, 176.5; MS (Electrospray) 531 (M+ - H+, 5%), 229 (100%).

A.2 Synthesis of carbamate 9 and ester 11.

**Allyl 3-(4-Hydroxyphenyl)propanoate (VII).** To a suspension of 3-(4-hydroxyphenyl propionic acid) (0.200 g, 1.20 mmol, 1.0 eq.) in distilled water (0.75 mL) was added a 40% aqueous solution of tetrabutyl ammonium hydroxide (0.79 mL, 1.20 mmol, 1.0 eq.), and the mixture was stirred at room temperature until all of the acid dissolved. Water was removed on a high-vacuum rotary evaporator, and the residue was placed under high vacuum for an additional 12 h, yielding the crude 3-(4-hydroxy-phenyl) propionic tetra-*n*-butyl ammonium salt as an off-white solid. The salt was dissolved in dry DMF (2 mL), and to this was added a solution of allyl chloride (0.0985 mL, 1.20 mmol, 1.0 eq.) in dry DMF (2 mL), over a period of 2 h, and the reaction was stirred for 12 h. The solution was then poured into water (20 mL) and extracted with ethyl acetate (320 mL). The combined extracts were washed with water (20 mL), a solution of NaHCO3 (5 % aqueous, 20 mL), dried (MgSO4) and concentrated under reduced pressure. The residue was purified by silica gel chromatography (hexanes:ethyl acetate = 90:10, Rf = 0.3) to yield pure **VII** as a pale yellow oil (0.185 g, 74%). 1H NMR (200 MHz, CDCl3):  2.62 (t, *J* = 7.5 Hz, 2H), 2.90 (t, *J* = 7.5 Hz, 2H), 4.58 (d, *J* = 5.5 Hz, 2H), 4.74 (s, 1H), 5.10 - 5.40 (m, 2H), 5.80 - 5.60 (m, 1H), 6.91 (d, *J* = 8.4 Hz, 2H), 7.07 (d, *J* = 8.4 Hz, 2H); 13C NMR (50 MHz, CDCl3):  30.2, 36.2, 65.2, 115.6, 118.2, 129.3, 132.2, 132.3, 154.5, 173.1; MS (EI): *m/z* 206 (M+, 65%), 123 (100%); HRMS(EI) calcd for C12H14O3 206.0943, found 206.0938.

**Allyl 3-[4-({[(4-nitrophenyl)amino]carbonyl}oxy)phenyl]propanoate (VIII).** To a stirring solution of **VII** (0.400 g, 1.94 mmol, 1.0 eq.) and dry triethylamine (0.200 L, 0.00136 mmol, 0.07 mol%) in dry benzene (4 mL) was added *p-*nitrophenylisocyanate (0.320 g, 1.94 mmol, 1.0 eq.), gradually over 1 min. Within 5 min, a thick, light yellow precipitate had formed, and did not dissolve even with addition of more dry benzene (5 mL). The solid was filtered and recrystallized in hexanes/ethyl acetate to yield product **VII** as a yellow solid (0.550 g, 77%). mp = 110-111 C; 1H NMR (200 MHz, CDCl3):  2.67 (t, *J* = 7.7 Hz, 2H), 2.99 (t, *J* = 7.7 Hz, 2H), 4.59 (d, *J* = 5.8 Hz, 2H), 5.15-5.35 (m, 2H), 5.80-5.60 (m, 1H), 7.11 (d, *J* = 8.8 Hz, 2H),7.26 (d, *J* = 8.8 Hz, 2H), 7.62 (d, *J* = 8.8 Hz, 2H), 8.24 (d, *J* = 8.8 Hz, 2H); 13C NMR (50 MHz, CDCl3):  30.3, 35.7, 65.3, 118.3, 121.4, 125.1, 129.4, 132.2, 138.5, 143.4, 143.5, 143.8, 148.9, 151.5, 172.5; MS (EI): *m/z* 370 (M+, trace), 165 (OOCCH2CH2ArOH, 63%), 123 (100%); HRMS(EI) calcd for C19H18N2O6 370.1165, found 370.1138.

**3-[4-({[(4-Nitrophenyl)amino]carbonyl}oxy)phenyl]propanoic acid (9).** The allyl ester **VIII** (0.200 g, 0.541 mmol, 1.0 eq.) was dissolved in dichloromethane/THF (4 mL, dichloromethane:THF = 1:1), and to this solution was added dimedone (0.190 g, 1.35 mmol, 2.5 eq.), and the catalyst, tetrakis triphenylphosphine Pd(0) (0.062 g, 0.054 mmol, 10 mol%). The reaction flask was covered with tin foil, and the clear yellow solution was stirred at room temperature for 12 h. During this time, a yellow precipitate formed, which was filtered, washed with dichloromethane (4 mL), and recrystallized in hexanes/ethyl acetate, to yield pure **9** as a yellow solid (0.070 g, 40%). mp = 180-181 C; 1H NMR (300 MHz, (CD3)2C(O)):  2.64 (t, *J* = 7.3 Hz, 2H), 2.95 (t, *J* = 7.3 Hz, 2H), 7.16 (d, *J* = 8.4 Hz, 2H), 7.34 (d, *J* = 8.4 Hz, 2H), 7.87 (d, *J* = 9.3 Hz, 2H), 8.27 (d, *J* = 9.3 Hz, 2H); 13C NMR (75 MHz, (CD3)2C(O)):  31.9, 37.0, 120.0, 123.5, 126.8, 131.1, 140.7, 144.8, 147.0, 150.9, 153.5, 175.1; MS (EI): *m/z* 330 (M+, trace), 164 (CONHArNO2 - H+, 52%), 107 (CH2ArOH, 100%); HRMS(EI) calcd for C16H14N2O6 330.0852, found 330.0825.

**Allyl 3-(4-{[(4-nitrophenyl)acetyl]oxy}phenyl)propanoate (IX).** To a solution of **VII** (0.400 g, 1.94 mmol, 1.0 eq.) in dry dichloromethane (10 mL) was added dry triethylamine (0.324 mL, 2.32 mmol, 1.2 eq.), and *p-*nitrophenylacetylchloride (0.464 g, 2.32 mmol, 1.2 eq.). The solution became dark brown in color, and was stirred at room temperature for 12 h. The reaction mixture was washed with water (220 mL), the aqueous solution was extracted with dichloromethane (220 mL), and the organic layer was dried (MgSO4) and concentrated using rotary evaporation. Product **IX** was obtained as an off-white semi-solid after purification *via* silica gel chromatography (100% dichloromethane, Rf = 0.6, then rechromatographed in hexanes:ethyl acetate = 70:30, Rf = 0.5; 0.504 g, 70%). 1H NMR (200 MHz, CDCl3):  2.65 (t, *J* = 7.7 Hz, 2H), 2.96 (t, *J* = 7.7 Hz, 2H), 3.98 (s, 2H), 4.58 (d, *J* = 5.8 Hz, 2H), 5.15 - 5.35 (m, 2H), 5.80 - 6.00 (m, 1H), 6.98 (d, *J* = 8.6 Hz, 2H), 7.21 (d, *J* = 8.6 Hz, 2H), 7.57 (d, *J* = 8.6 Hz, 2H), 8.27 (d, *J* = 8.6 Hz, 2H); 13C NMR (75 MHz, CDCl3):  30.0, 35.4, 40.7, 64.9, 118.0, 121.0, 123.6, 129.2, 130.2, 131.9, 138.2, 140.6, 147.1, 148.7, 168.6, 172.0; MS (EI): *m/z* 369 (M+, trace), 206 (M+ - C(O)CH2ArNO2 + H+, 99%), 165 (C(O)CH2ArNO2 + H+, 100%); HRMS(EI) calcd for C20H19NO6 369.1212, found 369.1215.

**3-(4-{[(4-Nitrophenyl)acetyl]oxy}phenyl)propanoic acid (11).** To a solution of **IX** (0.200 g, 0.542 mmol, 1.0 eq.) in dry dichloromethane/THF (5 mL, dichloromethane:THF = 1:1) was added dimedone (0.110 g, 0.785 mmol, 1.4 eq.), and the solution was stirred at room temperature until all the dimedone had dissolved. The catalyst, tetrakis triphenylphosphine Pd(0) (0.063 g, 0.055 mmol, 10 mol%), was added, and the reaction was covered with foil and stirred for 12 h at room temperature. Additional amounts of dimedone (0.076 g, 0.542 mmol, 1.0 eq.) and Pd catalyst (0.027 g, 0.030 mmol, 5.5 mol%) were added to the reaction, which was stirred for another 8 h at room temperature. The reaction mixture was concentrated by rotary evaporation, and the crude material was subjected to silica gel chromatography (hexanes:ethyl acetate = 40:60, Rf = 0.3), followed by recrystallization from ethyl acetate, to yield pure **11** as a light brown crystalline solid (0.119 g, 67%). mp = 173-174 C; 1H NMR (200 MHz, CDCl3):  2.67 (t, *J* = 7.5 Hz, 2H), 2.96 (t, *J* = 7.5 Hz, 2H), 3.97 (s, 2H), 7.00 (d, *J* = 8.6 Hz, 2H), 7.22 (d, *J* = 8.6 Hz, 2H), 7.57 (d, *J* = 8.2 Hz, 2H), 8.24 (d, *J* = 8.2 Hz, 2H); 13C NMR (50 MHz, (CD3)2C(O)):  31.0, 35.9, 41.3, 122.3, 124.3, 130.1, 131.7, 139.8, 142.8, 148.5, 150.4, 169.7, 173.8; MS (EI): *m/z* 329 (M+, trace), 166 (M+ - O2NArCH2C(O) + H+, 68%), 107 (100%); HRMS(EI) calcd for C17H15NO6 329.0899, found 329.0909.

A.3 Synthesis of amide 10.

***Tert*-butyl 3-(4-{[(4-nitrophenyl)acetyl]amino}phenyl)propanoate (XI).** To a suspension of *p*-nitrophenyl acetic acid (0.213 g, 1.17 mmol, 1.3 eq.), DCC (0.242 g, 1.17 mmol, 1.3 eq.), and HOBt (0.159 g, 1.17 mmol, 1.3 eq.) in dry dichloromethane (5 mL) was added a solution of *tert*-butyl 3-(4-aminophenyl)propanoate (**X**)1 (0.200 g, 0.900 mmol) in dry dichloromethane (3 mL) over a period of 1 min. Dry DMF (4 mL) was added to increase the solubility of the acid in the solvent, and the mixture was stirred for 48 h. Dichloromethane (15 mL) was added to the reaction mixture, and the organic layer was washed with water (215 mL), brine (215 mL), and dried (MgSO4). After evaporation of solvent under reduced pressure, the resulting off-white solid was subjected *to* silica gel chromatography (hexanes:ethyl acetate = 70:30, Rf = 0.25, then rechromatographed in dichloromethane:ethyl acetate = 95:5, Rf = 0.4) and then recrystallized in hexanes/ethyl acetate, to give **XI** as a white solid (0.165 g, 47%). mp = 170-172C; 1H NMR (200 MHz, CDCl3):  1.41 (s, 9H), 2.50 (t, *J* = 7.7 Hz, 2H), 2.87 (t, *J* = 7.7 Hz, 2H), 3.82 (s, 2H), 7.07 (bs, 1H), 7.15 (d, *J* = 8.6 Hz, 2H), 7.37 (d, *J* = 8.6 Hz, 2H), 7.54 (d, *J* = 8.6 Hz, 2H), 8.25 (d, *J* = 8.6 Hz, 2H); 13C NMR (50 MHz, CDCl3):  28.1, 30.6, 37.0, 43.9, 80.5, 120.5, 123.9, 128.9, 130.2, 135.7, 137.7, 142.1, 147.5, 167.5, 172.1; MS (EI): *m/z* 384 (M+, 7%), 328 (M+ + H+ - C(CH3)3, 100%); HRMS(EI) calcd for C21H24N2O5 384.1685, found 384.1691.

**3-(4-{[(4-Nitrophenyl)acetyl]amino}phenyl)propanoic acid (10).** The *t*-butyl ester **XI** (0.143 g, 0.371 mmol) was dissolved in a solution of TFA in dry dichloromethane (30 % TFA, 5 mL), and the solution was stirred at room temperature for 2 h, at which time the reaction had reached completion (TLC). The solvent was removed by rotary evaporation, the product was redissolved/resuspended in dichloromethane, and the flask was again placed on the rotary evaporator. After repeating this procedure several times to remove most of the TFA, the product was placed under high vacuum for 12 h. The resulting white solid was recrystallized in ethyl acetate to give pure **10** as a pale yellow solid (0.101 g, 83%). mp = 204-205C; 1H NMR (200 MHz, (CD3)2C(O)):  2.58 (t, *J* = 7.5 Hz, 2H), 2.87 (t, *J* = 7.5 Hz, 2H), 3.89 (s, 2H), 7.20 (d, *J* = 8.4 Hz, 2H), 7.56 (d, *J* = 8.4 Hz, 2H), 7.67 (d, *J* = 8.4 Hz, 2H), 8.21 (d, *J* = 8.4 Hz, 2H), 9.41 (bs, 1H); 13C NMR (75 MHz, (CD3)2C(O)):  31.9, 37.0, 45.1, 121.2, 121.3, 125.1, 130.4, 132.4, 138.3, 139.2, 145.8, 169.4, 174.9; MS (EI): *m/z* 328 (M+, 75%), 106 (100%); HRMS(EI) calcd for C17H16N2O5 328.1059, found 328.1053.

**B Kinetic Studies.**

An aliquot (4.5 L) of a stock solution of the model prodrug substrate **3**(1.54 mM – 6.67 mM) in DMSO was added to bicine buffer (100 mM bicine, 100 mM NaCl, 0.01 % NaN3, pH 9.0) and the solution was mixed well. A solution of the antibody in bicine buffer (100 mM bicine, 100 mM NaCl, 0.01 % NaN3, pH 9.0) was added, so that the final volume was 90 L and the final concentration of antibody was 5 M. The final concentration of DMSO was 5%, and the final concentration of **3** ranged from 0.077 mM to 0.333 mM in the antibody-containing reactions. The control reactions consisted of a solution of 0.077 mM to 0.333 mM **3** in 5/95 DMSO/bicine buffer (as above), with no antibody present. These solutions were mixed gently and were maintained at 25C in a water bath. At various time intervals, the solutions were gently mixed, and an aliquot (15 L) of each reaction mixture was withdrawn. To this was added a solution of *p*-nitroaniline (PNA, internal standard in 5/95 DMSO/bicine buffer), and concentrated perchloric acid (3 L). This solution was mixed well, and then centrifuged (micro-centrifuge), and the concentrations of PNP and Trp in the solution were determined by analytical reverse-phase HPLC (Waters 600 Controller, Waters 2487 Dual Wavelength () detector), Vydac #218TP54 reverse-phase analytical column): det = 280 nm for 10 min, followed by det = 325 nm for 50 min; mobile phase = 75/25 water (0.1 % TFA)/methanol for 25 min (flowrate = 0.9 mL/min for 13 min, 1.5 mL/min for 47 min), ramp to 100% methanol over 5 min, holding 100% methanol for 10 min, ramp back to 75/25 water (0.1 % TFA)/methanol over 5 min, holding this solvent system for 15 min. Retention times for the analytes were as follows: Trp = 8 - 9 min; PNA = 11 – 12 min; PNP = 16 – 17 min. The concentrations of Trp and PNP in the original reaction mixture were calculated from a previously prepared standard curves of the peak area ratio of PNP to PNA vs. [PNP] to [PNA] and peak area ratio of Trp to PNA vs. [Trp] to [PNA].The reactions were followed to approximately 5% completion, and plots of the concentration of PNP and Trp over time exhibited excellent linearity and similarity to one another. At the higher substrate concentrations, the reactions were followed for several turnovers and no loss of activity or curvature of the plots were evident. The initial velocities of the reactions at the various substrate concentrations were determined by taking the slopes of these plots. This procedure was repeated in duplicate for each substrate concentration. Lineweaver-Burk plots were generated using GrafIt.

**Figure 1.** Lineweaver-Burk plot for ST51 and substrate **3** at pH 9.0, using data obtained from monitoring production of Trp.

Figure 2. Lineweaver-Burk plot for ST51 and substrate 3 at pH 9.0, using data obtained from monitoring production of PNP.

### References

1. I.G.C Coutts, N.J. Culbert, M. Edwards, J. A. Hadfield, D.R. Musto *J. Chem. Soc. Perkin. Trans. I*, 1985, 1829.
